# Supplementary material
Source: MDPI journal article supplement (https://www.mdpi.com/1999-4907/14/2/430)
Supplement: s1 [file s1]

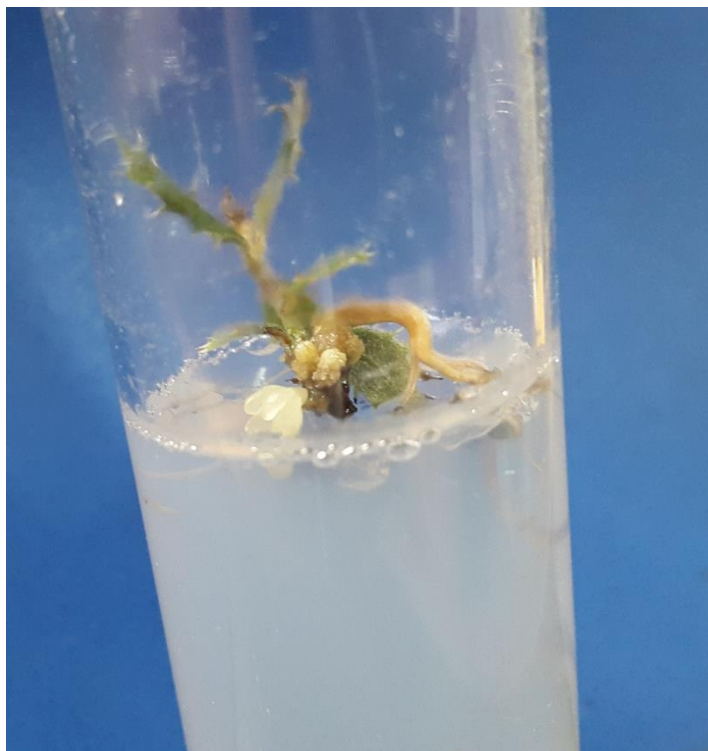

**Supplementary information S1:** Somatic embryo induced on the callus formed at the base of the axillary shoot subjected to rooting treatment consisting of IBA (3 mg/L) plus NAA (0.1 mg/L) for two weeks.

**Supplementary information S2:** Callus response of three different explant types excised from axillary shoot cultures of three adult genotypes of holm oak and cultured on three different treatments.

| Treatment<br>(mg/L)    | Callus from apex explants (%) |            |            | Callus from node explants (%) |            |             | Callus from leaf explants (%) |             |            |
|------------------------|-------------------------------|------------|------------|-------------------------------|------------|-------------|-------------------------------|-------------|------------|
|                        | Q10-SE                        | Q3-SE      | E00        | Q10-SE                        | Q3-SE      | E00         | Q10-SE                        | Q3-SE       | E00        |
| <b>IAA 4 + BA 0.5</b>  |                               |            |            |                               |            |             |                               |             |            |
| <b>2wks</b>            | 34.0 ± 4.8                    | 0.0 ± 0.0  | 1.0 ± 0.9  | 78.0 ± 5.1                    | 0.0 ± 0.0  | 2.0 ± 1.3   | 7.0 ± 2.0                     | 0.0 ± 0.0   | 82.0 ± 4.4 |
| <b>4wks</b>            | 76.0 ± 4.8                    | 2.0 ± 1.3  | 27.0 ± 2,5 | 79.0 ± 5.1                    | 7.0 ± 2.6  | 22.0 ± 1.9  | --                            | --          | --         |
| <b>8wks</b>            | 72.0 ± 5.9                    | 21.0 ± 6.8 | 57.0 ± 4.5 | 84.0 ± 4.3                    | 22.0 ± 5.3 | 38.0 ± 5.3  | 40.0 ± 4.1                    | 2.0 ± 1.3   | 99.0 ± 0.9 |
| <b>NAA 4 + BA 0.5</b>  |                               |            |            |                               |            |             |                               |             |            |
| <b>2wks</b>            | 100.0 ± 0.0                   | 14.0 ± 2.1 | 96.0 ± 1.6 | 97.0 ± 2.0                    | 52.0 ± 7.2 | 94.0 ± 2.9  | 98.0 ± 1.3                    | 40.0 ± 4.3  | 3.0 ± 1.5  |
| <b>4wks</b>            | 100.0 ± 0.0                   | 42.0 ± 7.9 | 98.0 ± 1.6 | 100.0 ± 0.0                   | 57.0 ± 3.2 | 97.0 ± 2.0  | --                            | --          | --         |
| <b>8wks</b>            | 100.0 ± 0.0                   | 34.0 ± 4.1 | 99.0 ± 0.9 | 100.0 ± 0.0                   | 64.0 ± 5.3 | 99.0 ± 0.9  | 99.0 ± 1.0                    | 74.0 ± 3.8  | 43.0 ± 1.5 |
| <b>IBA 3 + NAA 0.1</b> |                               |            |            |                               |            |             |                               |             |            |
| <b>2wks</b>            | 100.0 ± 0.0                   | 99.1 ± 1.0 | 96.0 ± 2.1 | 100.0 ± 0.0                   | 91.0 ± 4.8 | 86.0 ± 3.5  | 100.0 ± 0.0                   | 96.0 ± 2.1  | 83.0 ± 4,7 |
| <b>8wks</b>            | 99.0 ± 1.0                    | 94.0 ± 3.2 | 98.0 ± 1.9 | 100.0 ± 0.0                   | 84.0 ± 3.2 | 100.0 ± 0.0 | 100.0 ± 0.0                   | 100.0 ± 0.0 | 96.0 ± 2.1 |

BA: 6-Benzylaminopurine; IAA: indole-3-acetic acid; IBA: indole-3-butyric acid; NAA: 1-naphthaleneacetic acid; wks: weeks.

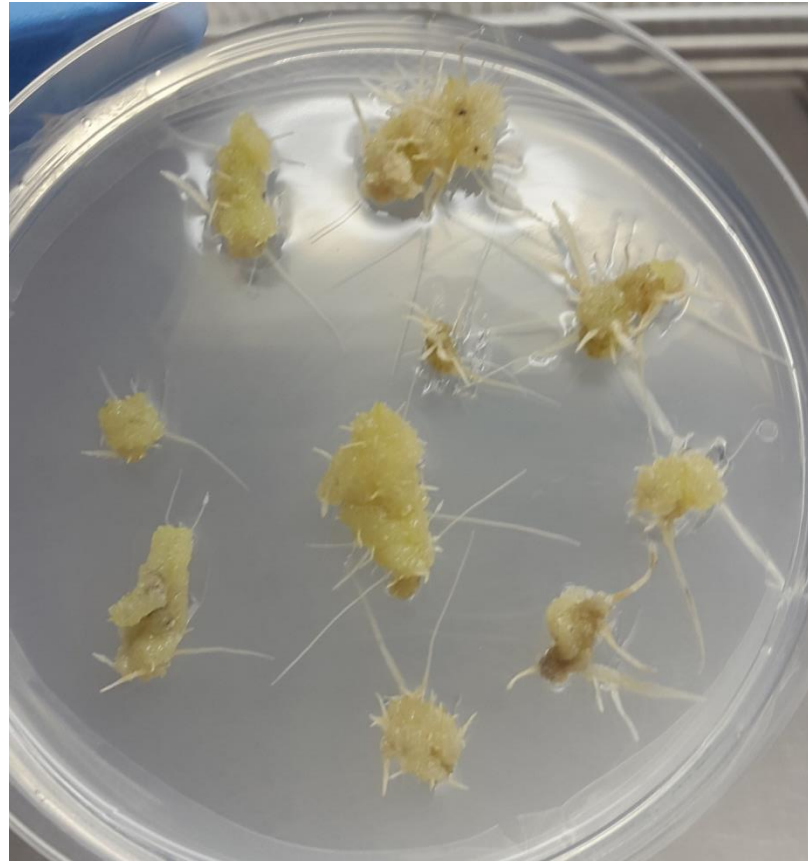

**Supplementary information S3:** Adventitious root formation in leaves cultured on induction medium with 3 mg/L IBA plus 0.1 mg/L NAA.

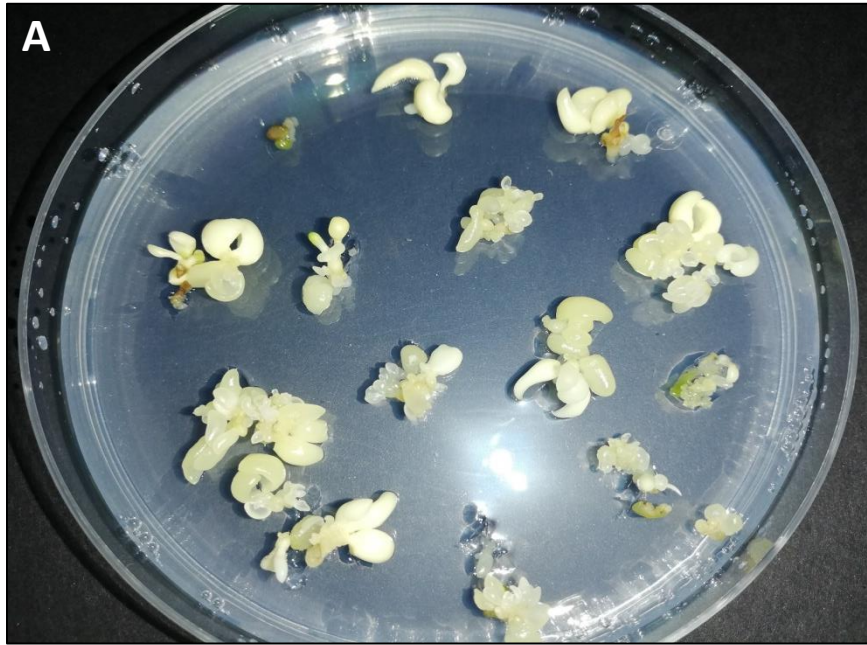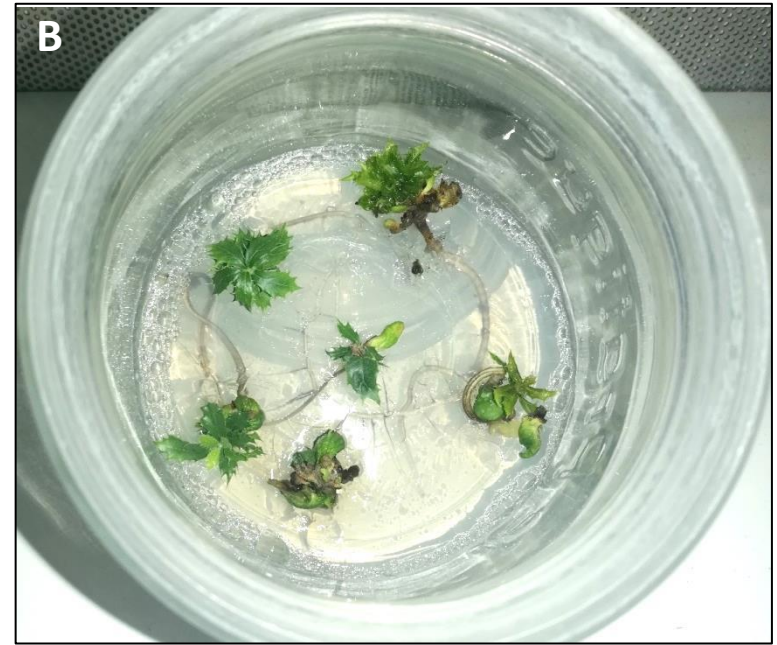

**Supplementary information S4:** A. Somatic embryos originated from proembryogenic masses after 6 weeks of culture on proliferation medium. B. Plant recovery after 8 weeks of culture of somatic embryos in germination medium. A: diameter dish 90 mm. B: diameter jar 90 cm.
